# Supplementary material for: The photophysical properties of naphthalene bridged disilanes
Source: Royal Society of Chemistry journal article supplement (doi:10.1039/d1ra02961d), 2021-01-01
Supplement: d1ra02961d1.pdf [file d1ra02961d1.pdf]

## The photophysical properties of naphthalene bridged disilanes

Vipin B. Kumar<sup>a,b</sup>, Cassandra L. Fleming,<sup>c</sup> Sai Shruthi Murali,<sup>d</sup> Paul Hume,<sup>b,d</sup> Nathaniel J. L. K. Davis,<sup>b,d</sup> Tilo Söhnel<sup>a,b</sup> and Erin M. Leitao<sup>\*a,b</sup>

<sup>a</sup> School of Chemical Sciences, University of Auckland, Private Bag, 92019, Auckland 1142, New Zealand

<sup>b</sup> The MacDiarmid Institute for Advanced Materials and Nanotechnology, New Zealand

<sup>c</sup> Centre for Biomedical and Chemical Sciences, School of Science, Auckland University of Technology, Private Bag 92006, Auckland 1142, New Zealand.

<sup>d</sup> School of Chemical and Physical Sciences, Victoria University of Wellington, PO Box 6006140, New Zealand

### Contents:

- (i) NMR spectra
- (ii) XRD data and calculated LUMOs
- (iii) UV-Vis absorption and fluorescence spectra
- (iv) Cyclic Voltammetry measurements

(i) NMR spectra

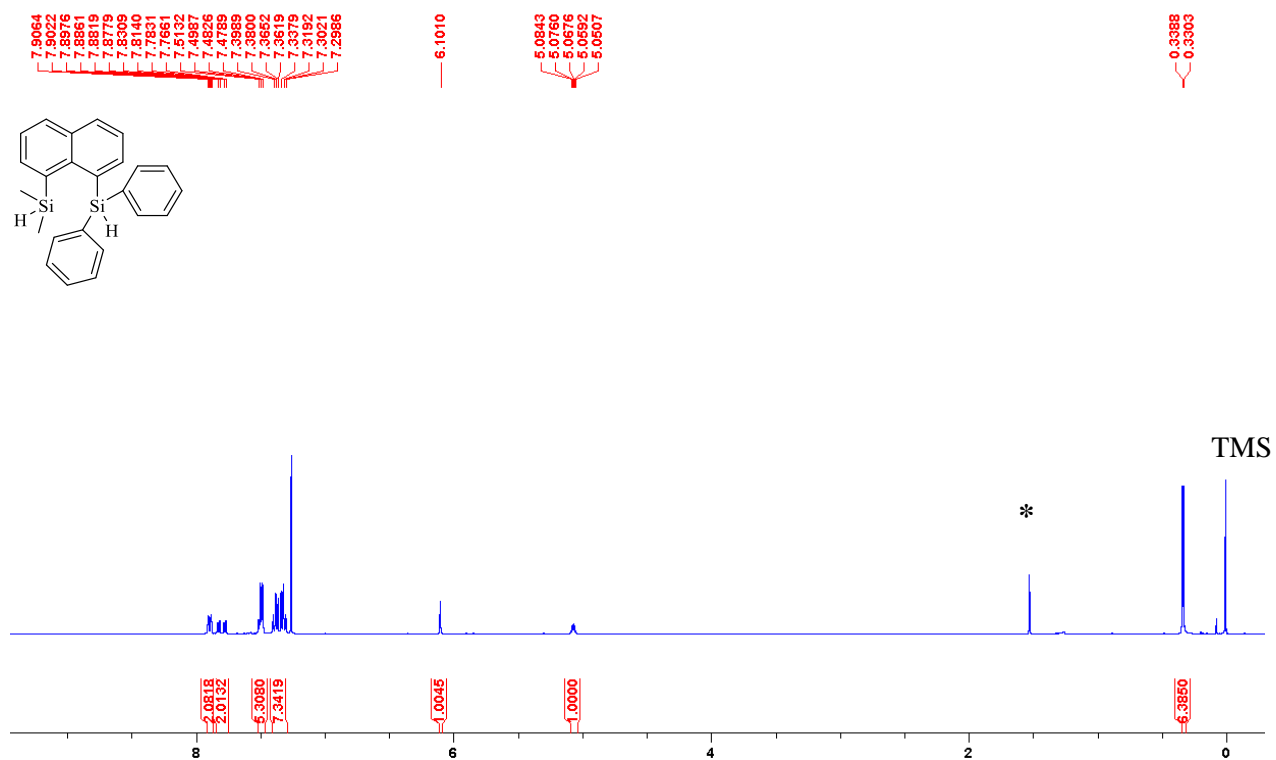

Figure S1 <sup>1</sup>H NMR spectrum of 1a, in CDCl<sub>3</sub> (\* H<sub>2</sub>O)

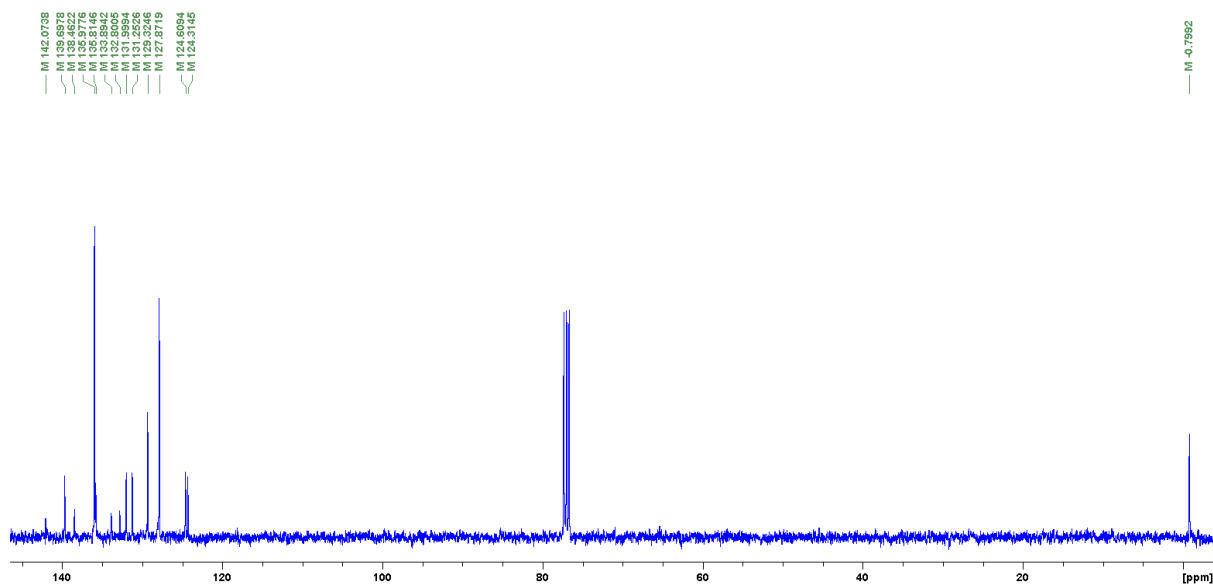

Figure S2 <sup>13</sup>C{<sup>1</sup>H} NMR spectrum of 1a, in CDCl<sub>3</sub>

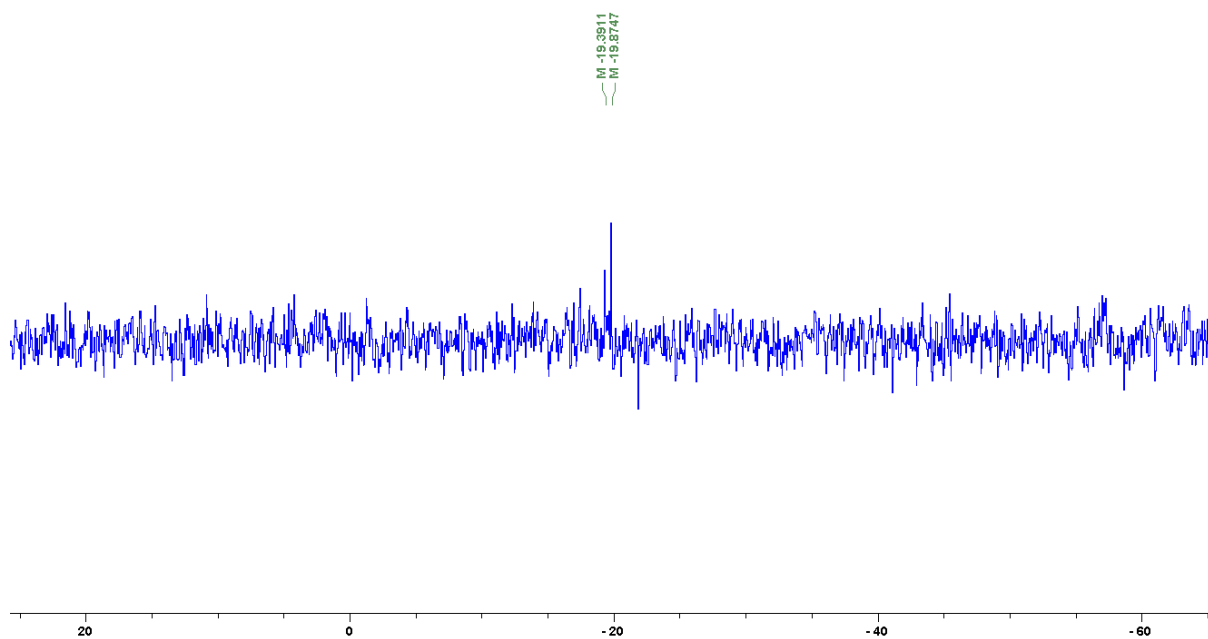

**Figure S3**  $^{29}\text{Si}\{^1\text{H}\}$  NMR spectrum of **1a**, in  $\text{CDCl}_3$

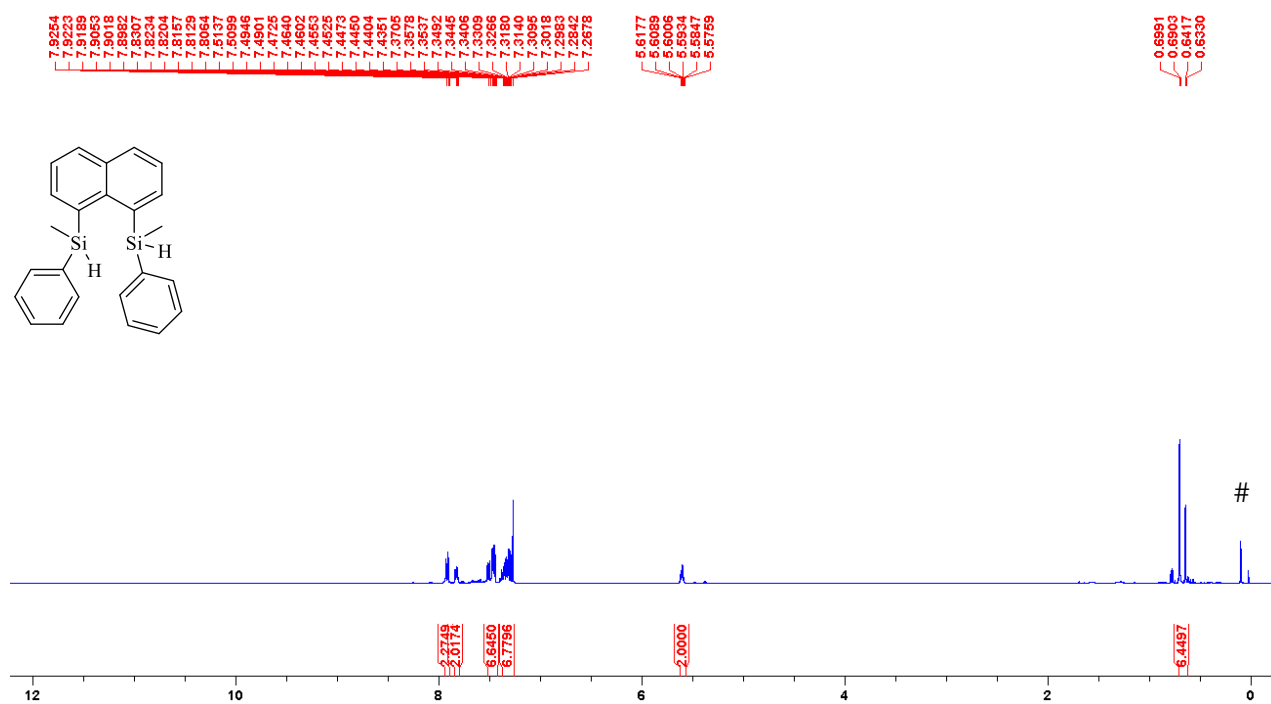

**Figure S4**  $^1\text{H}$  NMR spectrum of **2a**, in  $\text{CDCl}_3$  (# grease)

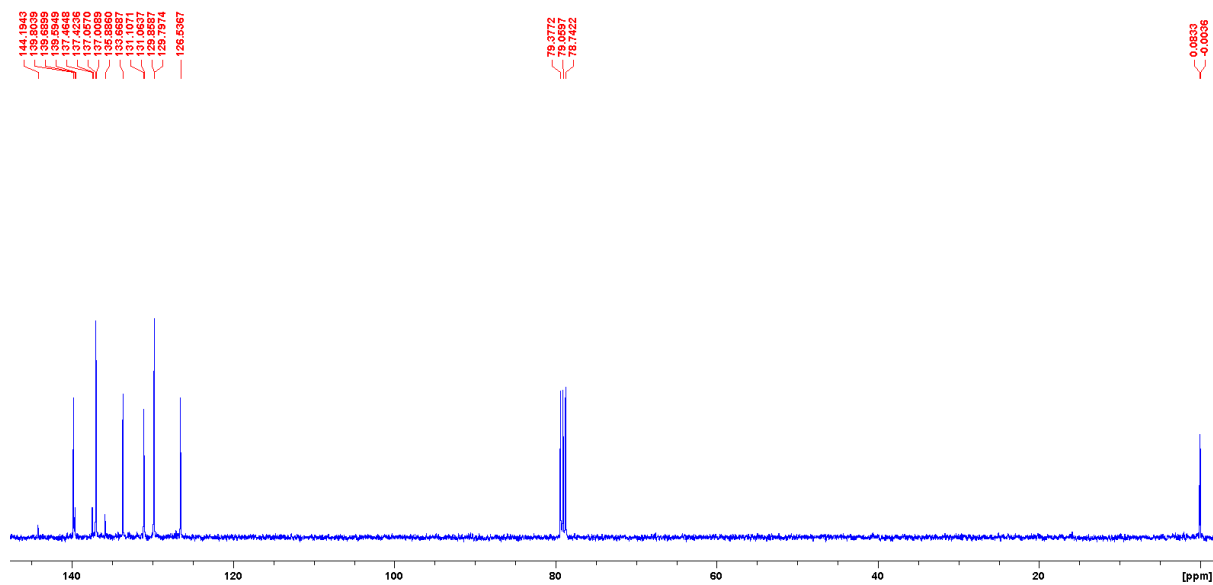

Figure S5  $^{13}\text{C}\{^1\text{H}\}$  NMR spectrum of **2a**, in  $\text{CDCl}_3$

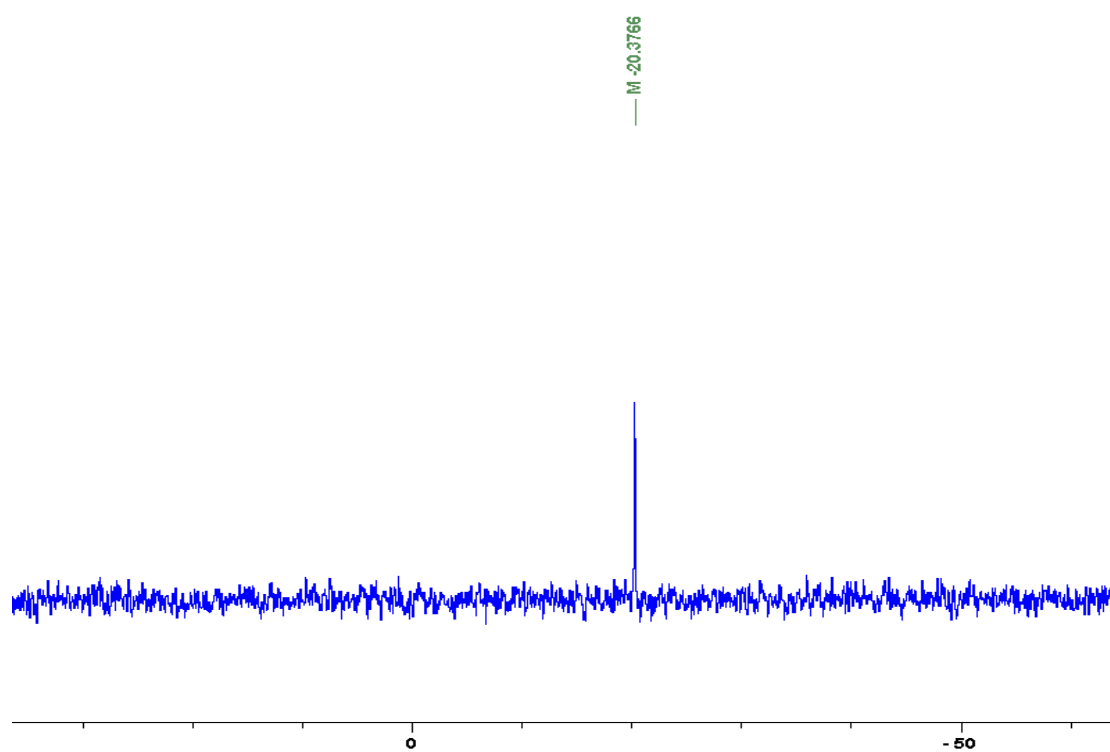

Figure S6  $^{29}\text{Si}\{^1\text{H}\}$  NMR spectrum of **2a**, in  $\text{CDCl}_3$

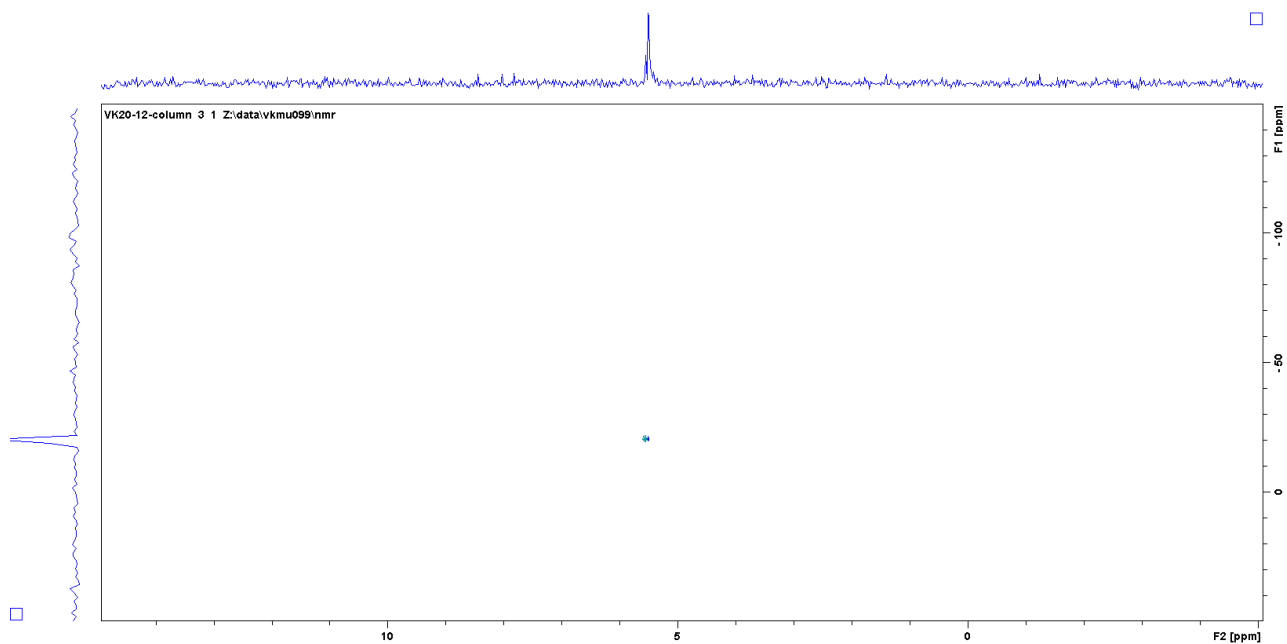

**Figure S7**  $^{29}\text{Si}\{^1\text{H}\}$ -HSQC 2D-NMR spectrum of **2a**, in  $\text{CDCl}_3$

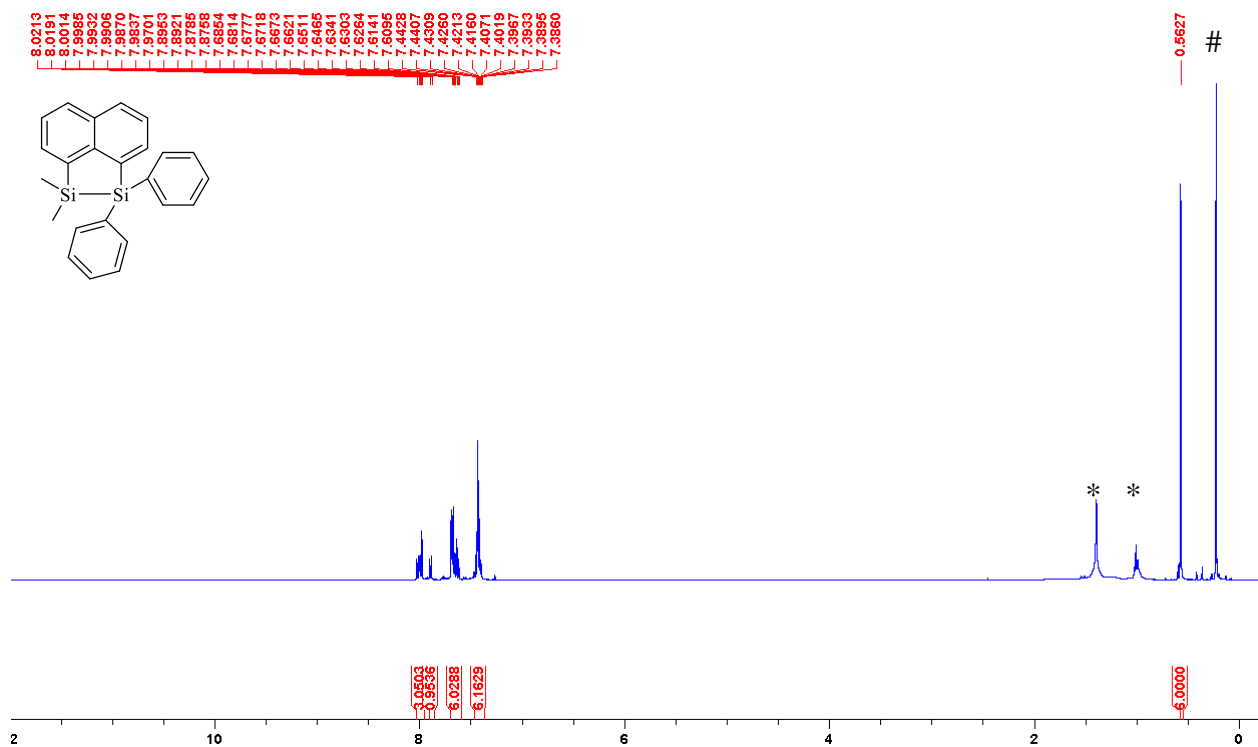

**Figure S8**  $^1\text{H}$  NMR spectrum of **1b**, in  $\text{CDCl}_3$  (\**n*-hexane, # grease).

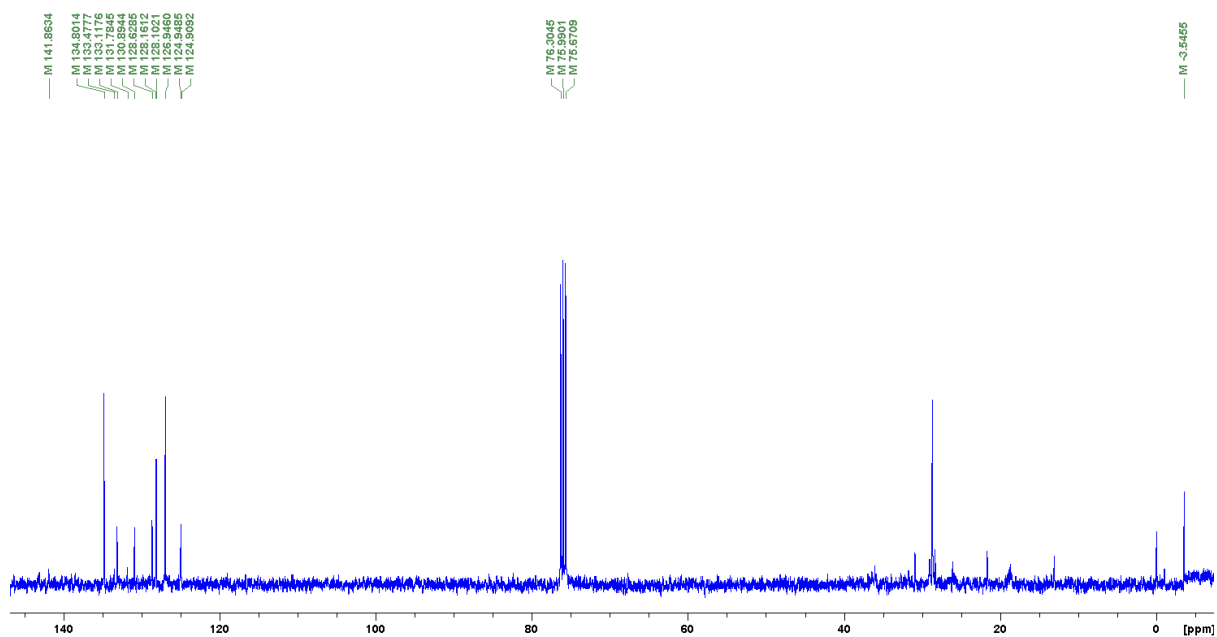

**Figure S9**  $^{13}\text{C}\{^1\text{H}\}$  NMR spectrum of **1b**, in  $\text{CDCl}_3$

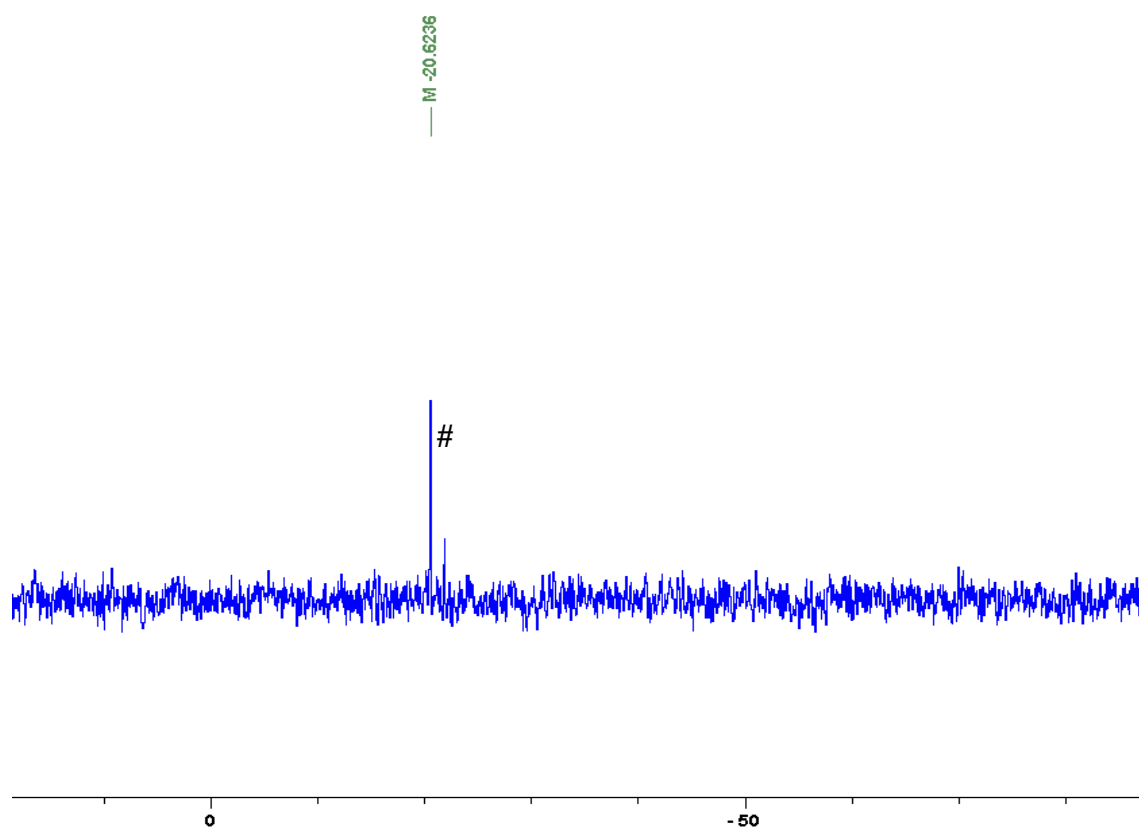

**Figure S10**  $^{29}\text{Si}\{^1\text{H}\}$  NMR spectrum of **1b**, in  $\text{CDCl}_3$  (# grease).

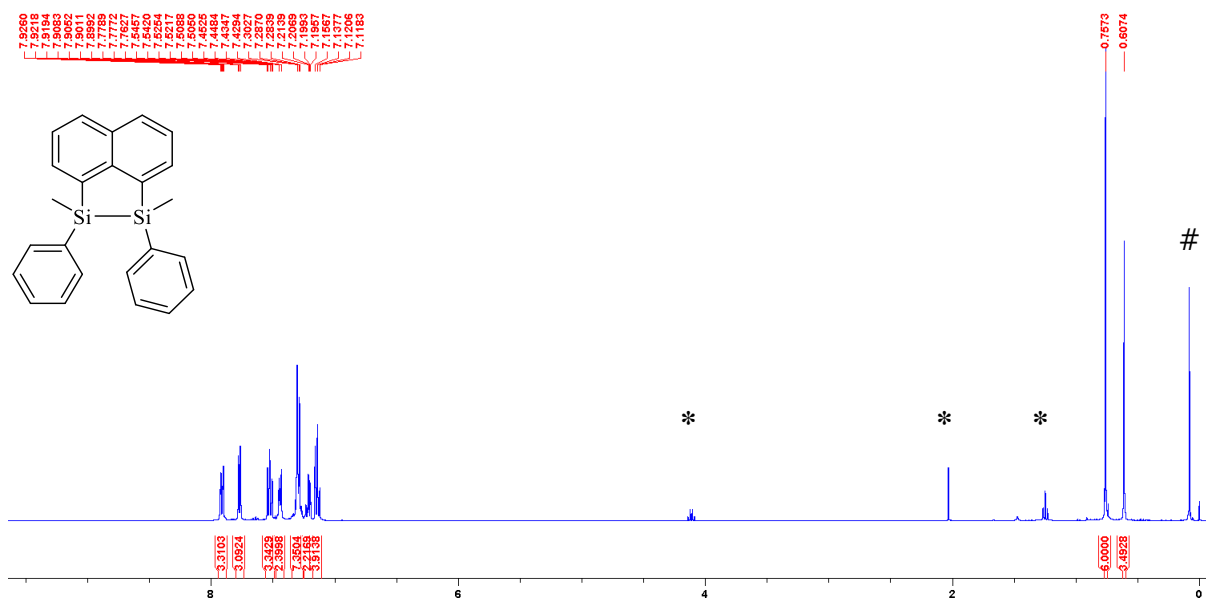

**Figure S11** <sup>1</sup>H NMR spectrum of **2b**, in CDCl<sub>3</sub> (\*diethyl ether and acetone, and # grease)

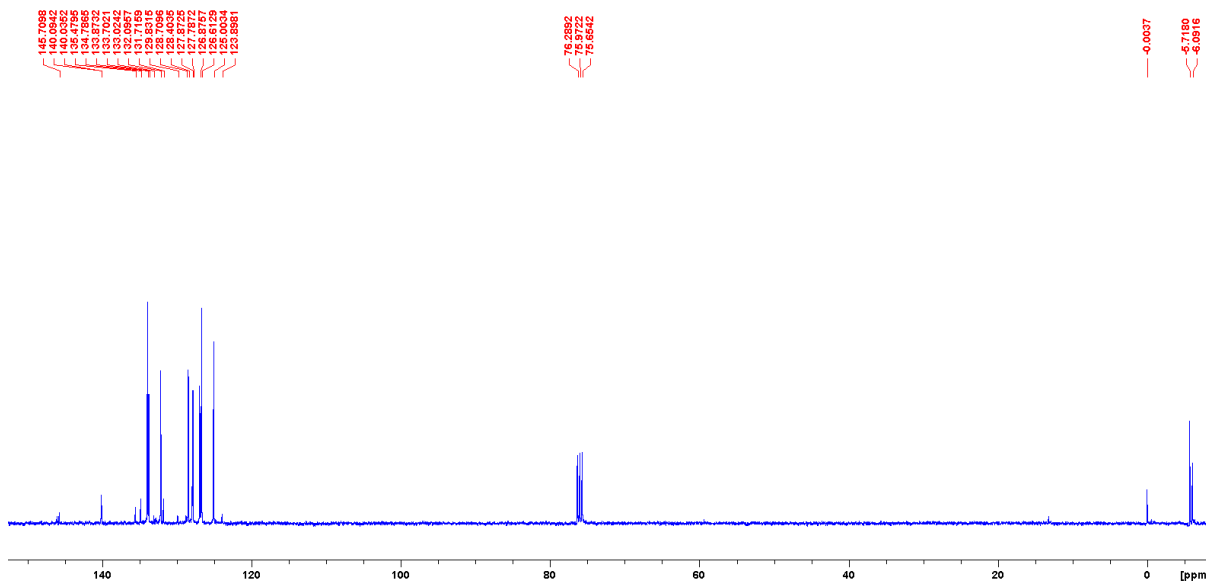

**Figure S12** <sup>13</sup>C {<sup>1</sup>H} NMR spectrum of **2b**, in CDCl<sub>3</sub>

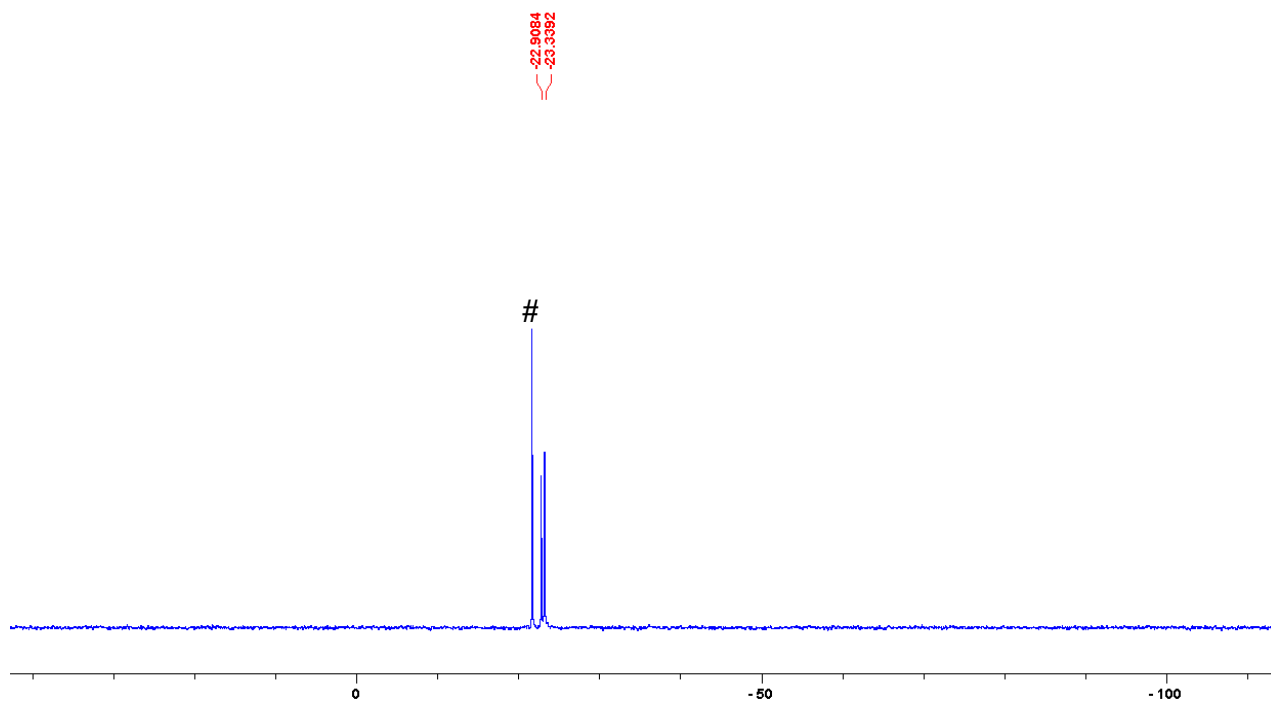

**Figure S13**  $^{29}\text{Si}\{^1\text{H}\}$  NMR spectrum of **2b**, in  $\text{CDCl}_3$  (# grease). Two peaks in the spectrum correspond to the two isomeric products of **2b**

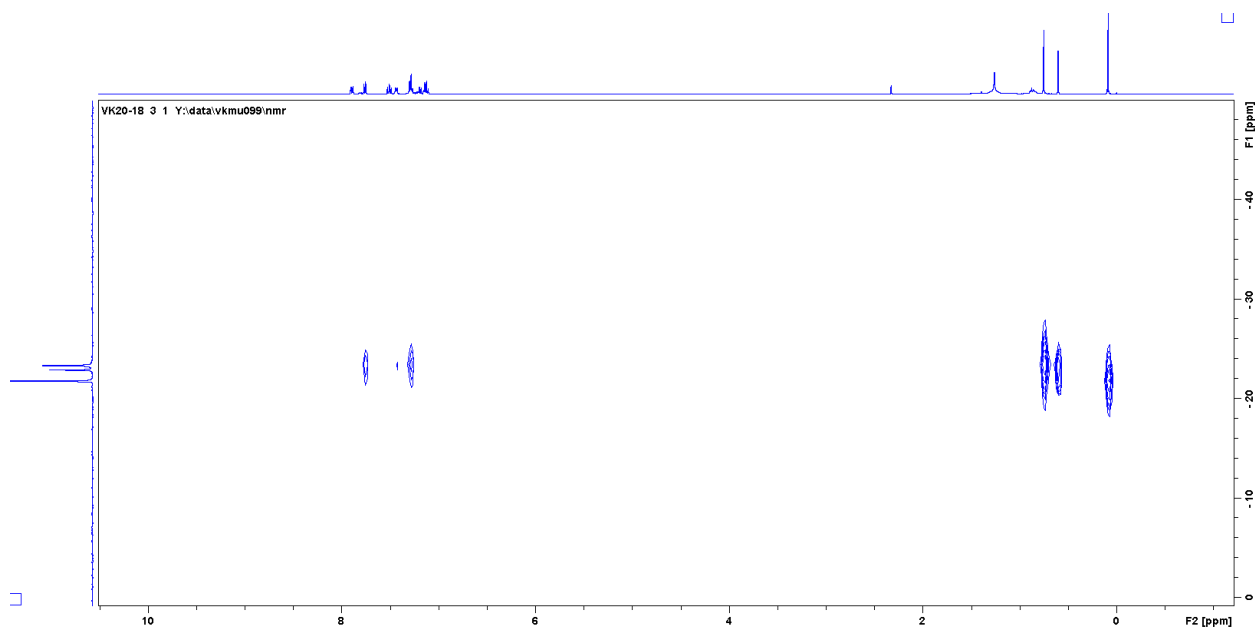

**Figure S14**  $^{29}\text{Si}\{^1\text{H}\}$ -HMBC NMR spectrum of **2b**, in  $\text{CDCl}_3$ .



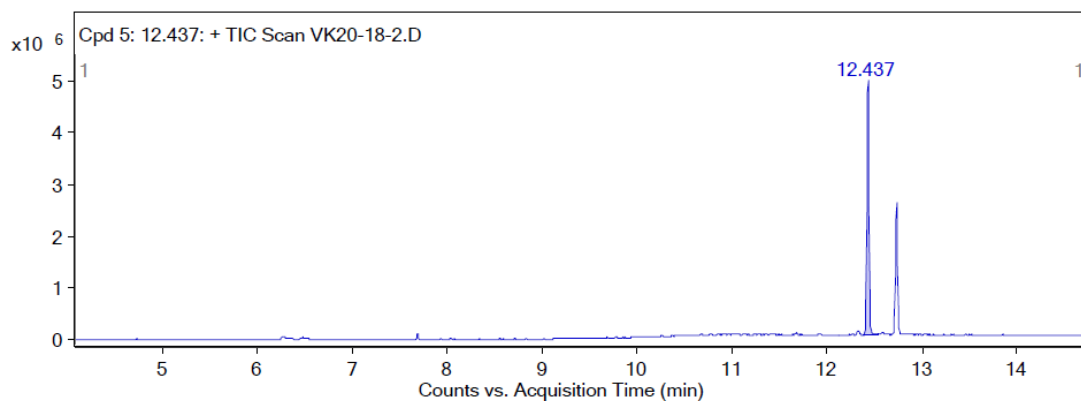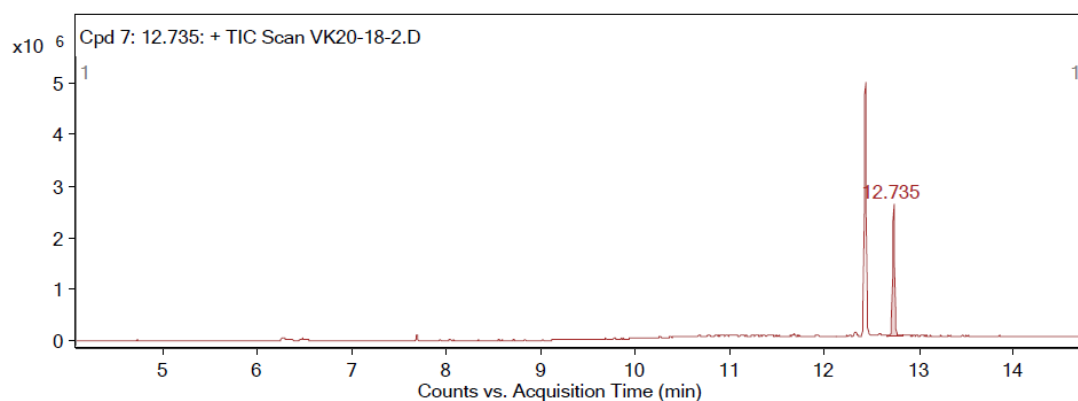

MS Spectrum

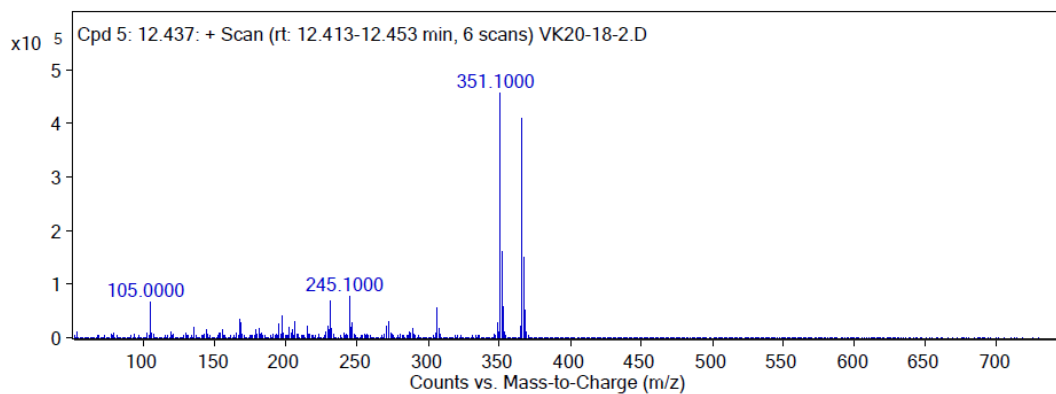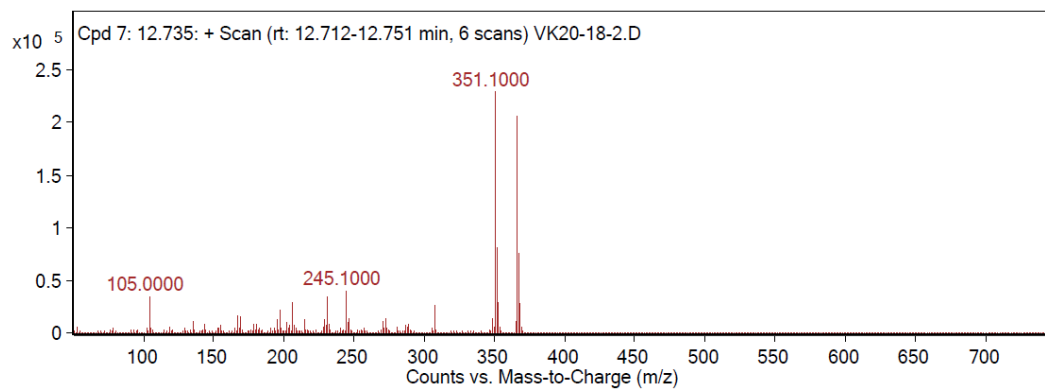

**Figure S15** GC-MS spectra of **2b** confirming the presence of two isomers.

(ii) XRD data and calculated LUMOs

Table S1. Crystallographic data for compounds **1a** and **1b**.

| Compound                                                          | <b>1a</b>                                                                                     | <b>1b</b>                                                                                 |
|-------------------------------------------------------------------|-----------------------------------------------------------------------------------------------|-------------------------------------------------------------------------------------------|
| CCDC deposition number                                            | 2060937                                                                                       | 2060939                                                                                   |
| Chemical Formula                                                  | C <sub>24</sub> H <sub>24</sub> Si <sub>2</sub>                                               | C <sub>24</sub> H <sub>22</sub> Si <sub>2</sub>                                           |
| <i>M</i> /g mol <sup>-1</sup>                                     | 368.63                                                                                        | 366.59                                                                                    |
| Temperature /K                                                    | 174(30)                                                                                       | 100(1)                                                                                    |
| Crystal system                                                    | Monoclinic                                                                                    | Orthorhombic                                                                              |
| Space group                                                       | <i>P</i> 2 <sub>1</sub> / <i>n</i>                                                            | <i>P</i> 2 <sub>1</sub> 2 <sub>1</sub> 2 <sub>1</sub>                                     |
| <i>a</i> /Å                                                       | 9.2512(2)                                                                                     | 7.7979(2)                                                                                 |
| <i>b</i> /Å                                                       | 18.1877(6)                                                                                    | 36.7369(6)                                                                                |
| <i>c</i> /Å                                                       | 12.5609(3)                                                                                    | 14.1416(2)                                                                                |
| $\alpha$ /°                                                       | 90                                                                                            | 90                                                                                        |
| $\beta$ /°                                                        | 104.094(2)                                                                                    | 90                                                                                        |
| $\gamma$ /°                                                       | 90                                                                                            | 90                                                                                        |
| Volume /Å <sup>3</sup>                                            | 2049.85(10)                                                                                   | 4051.15(14)                                                                               |
| <i>Z</i>                                                          | 4                                                                                             | 8                                                                                         |
| $\rho_{\text{calc}}$ /cm <sup>3</sup>                             | 1.194                                                                                         | 1.202                                                                                     |
| $\mu$ /mm <sup>-1</sup>                                           | 1.583                                                                                         | 1.602                                                                                     |
| <i>F</i> (000)                                                    | 784                                                                                           | 1552                                                                                      |
| Crystal size/mm <sup>3</sup>                                      | 0.15 x 0.12 x 0.11                                                                            | 0.050 x 0.050 x 0.010                                                                     |
| Radiation (wavelength/Å)                                          | CuK $\alpha$ ( $\lambda$ =1.54184)                                                            | CuK $\alpha$ ( $\lambda$ =1.54184)                                                        |
| 2 $\theta$ range /°                                               | 11.782 to 135.462                                                                             | 11.488 to 136.486                                                                         |
| Index ranges                                                      | -8 $\leq$ <i>h</i> $\leq$ 11, -21 $\leq$ <i>k</i> $\leq$ 21,<br>-15 $\leq$ <i>l</i> $\leq$ 15 | -9 $\leq$ <i>h</i> $\leq$ 9, -36 $\leq$ <i>k</i> $\leq$ 44, -10 $\leq$ <i>l</i> $\leq$ 17 |
| Reflections collected                                             | 24447                                                                                         | 26139                                                                                     |
| Independent reflections                                           | 3691(0.0700)                                                                                  | 7418(0.0557)                                                                              |
| Date/restraints/parameters                                        | 3691/0/245                                                                                    | 7418/0/473                                                                                |
| Goodness-of-Fit on <i>F</i> <sup>2</sup>                          | 1.103                                                                                         | 1.032                                                                                     |
| Final <i>R</i> indexes [ <i>I</i> $\geq$ 2 $\sigma$ ( <i>I</i> )] | <i>R</i> <sub>1</sub> = 0.0422, <i>wR</i> <sub>2</sub> = 0.1035                               | <i>R</i> <sub>1</sub> = 0.0341, <i>wR</i> <sub>2</sub> = 0.0795                           |
| Final <i>R</i> indexes [all data]                                 | <i>R</i> <sub>1</sub> = 0.0521, <i>wR</i> <sub>2</sub> =0.1138                                | <i>R</i> <sub>1</sub> = 0.0414, <i>wR</i> <sub>2</sub> = 0.0824                           |
| Largest diff. peak/hole / e Å <sup>-3</sup>                       | 0.32/-0.44                                                                                    | 0.27/-0.21                                                                                |
| Flack parameter                                                   | -                                                                                             | 0.036(17)                                                                                 |

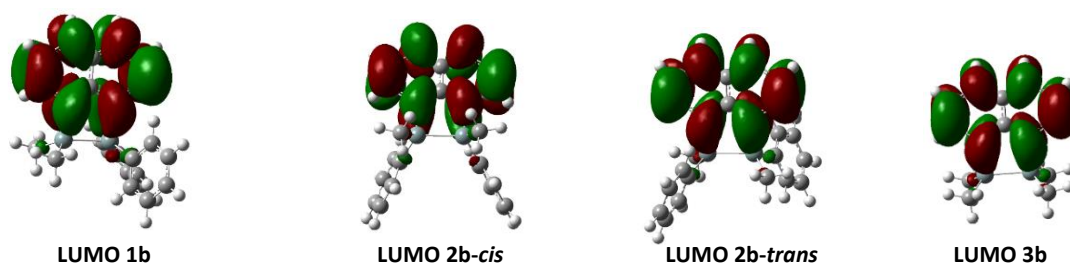

Figure S16 Calculated LUMOs from the optimised structures of **1b**, **2b** (*cis/trans*) and **3b**

### (iii) UV-Vis and fluorescence spectra

The experimental set-up consisted of a quartz cuvette for spectroscopic measurements. HPLC grade and dry solvents were used to prepare the samples.

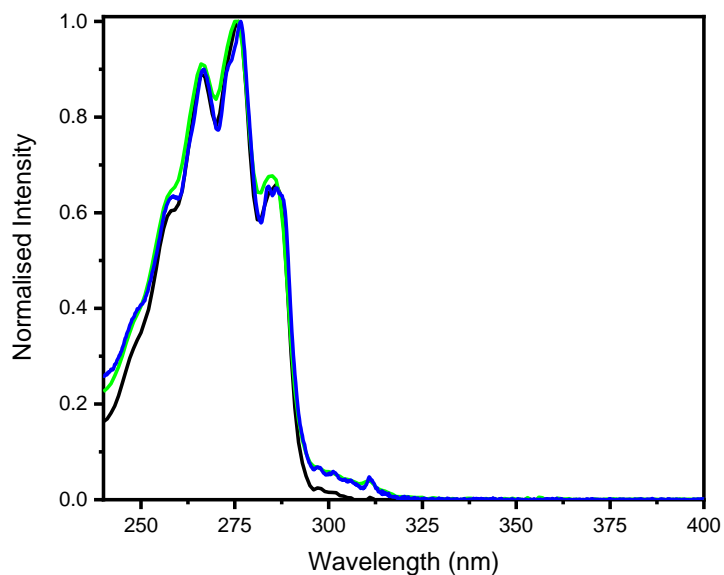

**Figure S17** Absorption spectra of **naphthalene** in cyclohexane (*black*), THF (*blue*), acetonitrile (*green*).

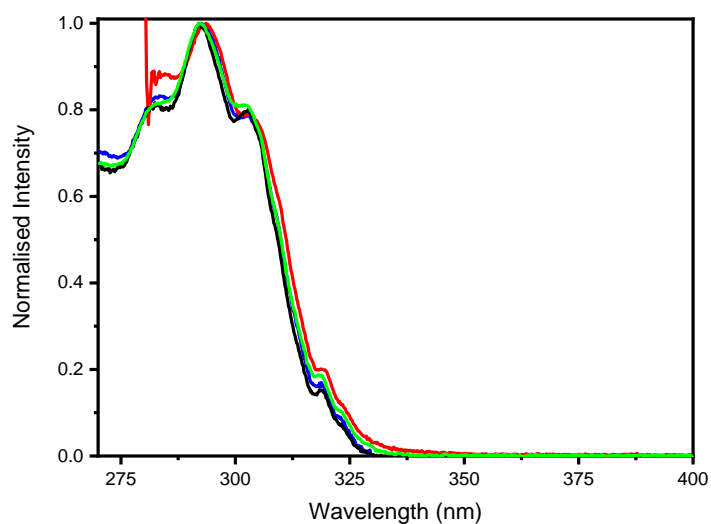

**Figure S18** Absorption spectra of **1b** in cyclohexane (*black*), toluene (*red*), THF (*blue*), acetonitrile (*green*).

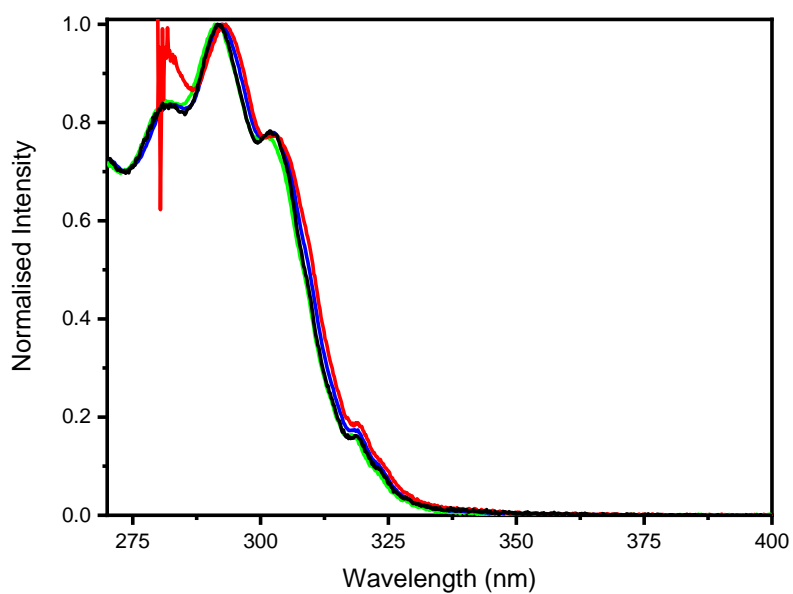

**Figure S19** Absorption spectra of **2b** in cyclohexane (*black*), toluene (*red*), THF (*blue*), acetonitrile (*green*).

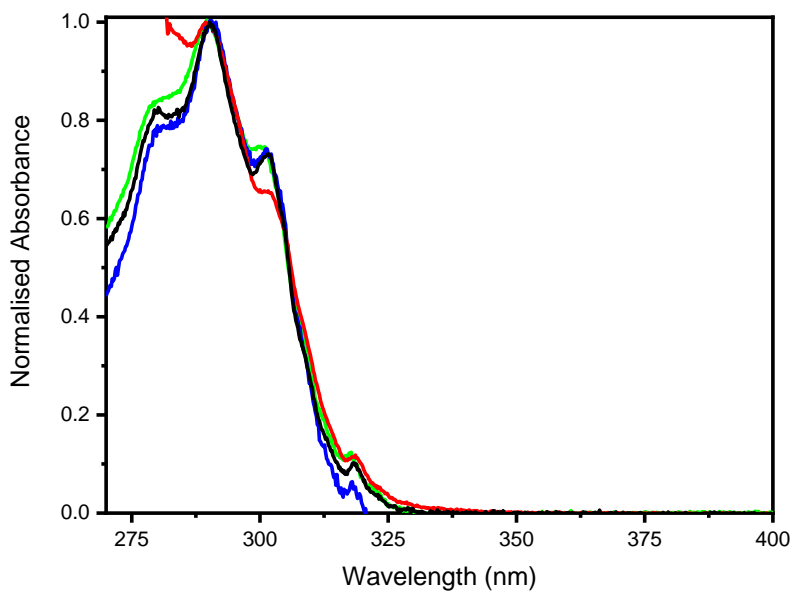

**Figure S20** Absorption spectra of **3b** in cyclohexane (*black*), toluene (*red*), THF (*blue*), acetonitrile (*green*).

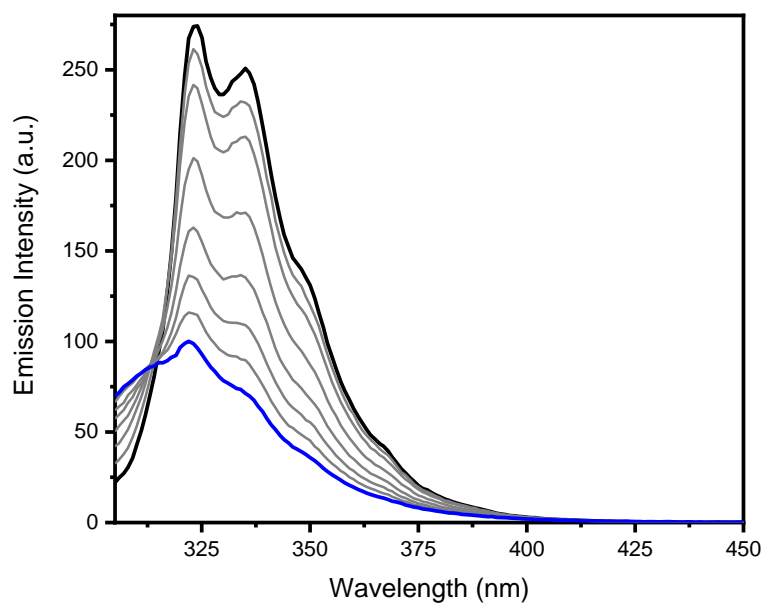

**Figure S21** Concentration dependent emission of compound **naphthalene** in THF upon excitation at 288 nm. Concentration range of compound **naphthalene**:  $1.76 \times 10^{-4}$  M (*black*)  $\rightarrow$   $3.49 \times 10^{-5}$  M (*blue*).

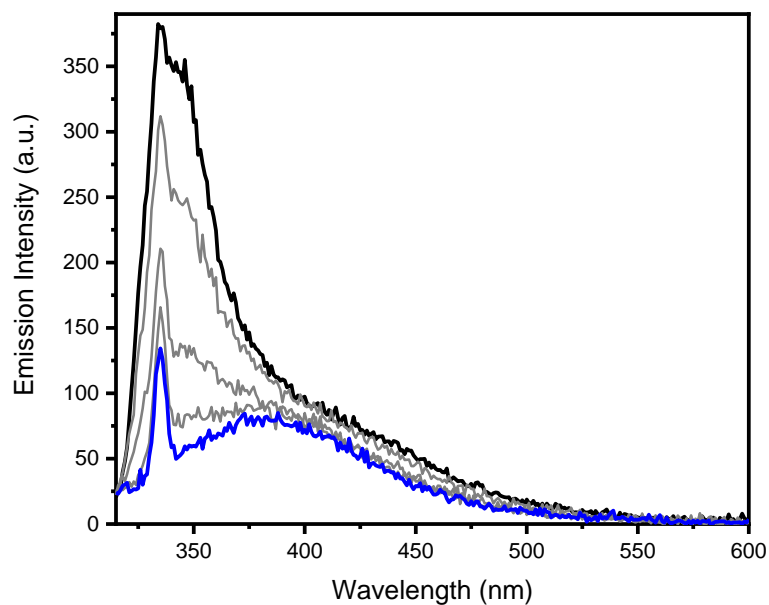

**Figure S22** Concentration dependent emission of compound **1b** in THF upon excitation at 305 nm. Concentration range of compound **1b**:  $1.26 \times 10^{-4}$  M (*black*)  $\rightarrow$   $1.50 \times 10^{-6}$  M (*blue*).

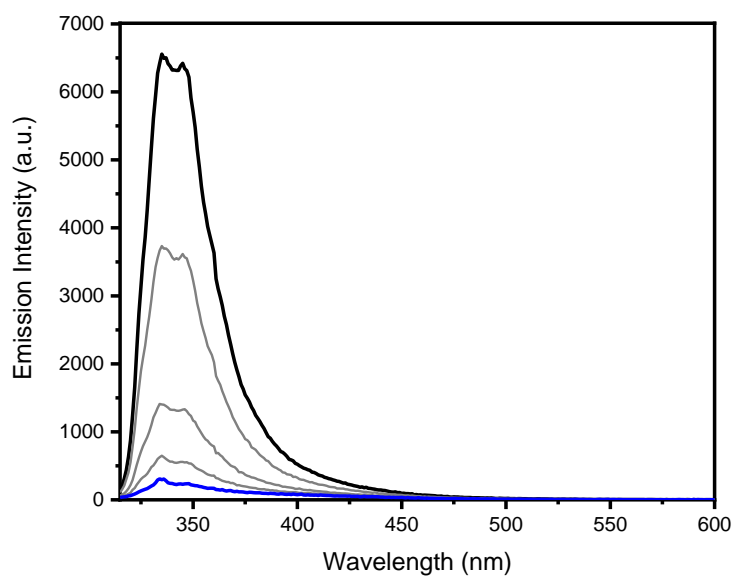

**Figure S23** Concentration dependent emission of compound **2b** in THF upon excitation at 305 nm. Concentration range of compound **2b**:  $1.36 \times 10^{-4}$  M (*black*)  $\rightarrow$   $1.61 \times 10^{-6}$  M (*blue*).

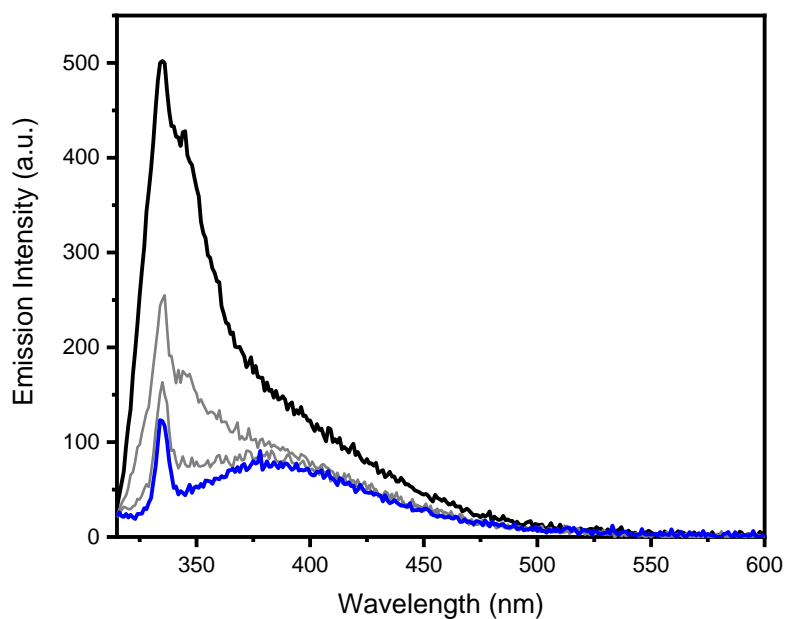

**Figure S24** Concentration dependent emission of compound **3b** in THF upon excitation at 305 nm. Concentration range of compound **3b**:  $1.82 \times 10^{-4}$  M (*black*)  $\rightarrow$   $1.40 \times 10^{-6}$  M (*blue*).

#### **(iv) Cyclic Voltammetry measurements**

Cyclic voltammetry of the bridged disilanes (**1b**, **2b** and **3b**) were performed at room temperature utilizing a BAS CGME Controlled Mercury Electrode cell stand at scan rates of  $0.1 \text{ Vs}^{-1}$ , with glassy carbon as the working electrode, a platinum auxiliary electrode and silver wire as a quasi-reference electrode. The glassy electrode was polished with  $\text{Al}_2\text{O}_3$  fine particles and washed with water and acetone prior to use. The auxiliary electrode and the reference electrode were washed with acetone prior to use. The measurements were performed in dry acetonitrile in presence of  $n\text{-Bu}_4\text{NPF}_6$  (0.2 mol/L) as the electrolyte and ferrocene/ferrocenium couple acting as the internal standard. The concentration of the bridged disilanes used was 1 mmol/L and the samples were degassed with nitrogen prior to the measurements which were also maintained under a nitrogen blanket.

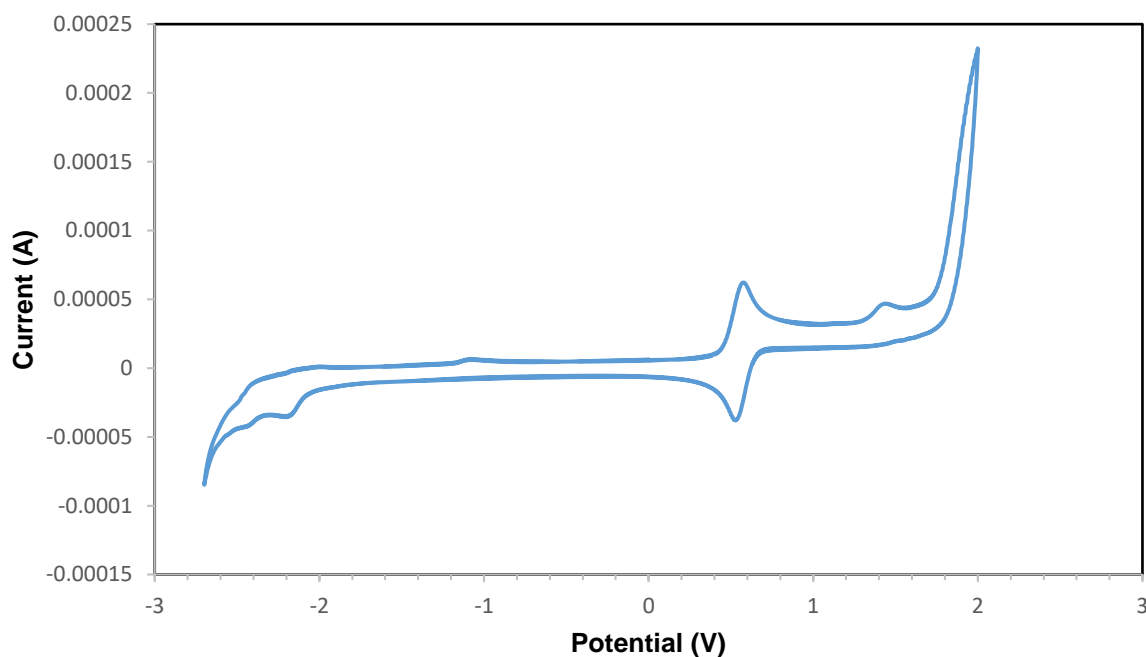

**Figure S25** Cyclic voltammogram of **1b**.

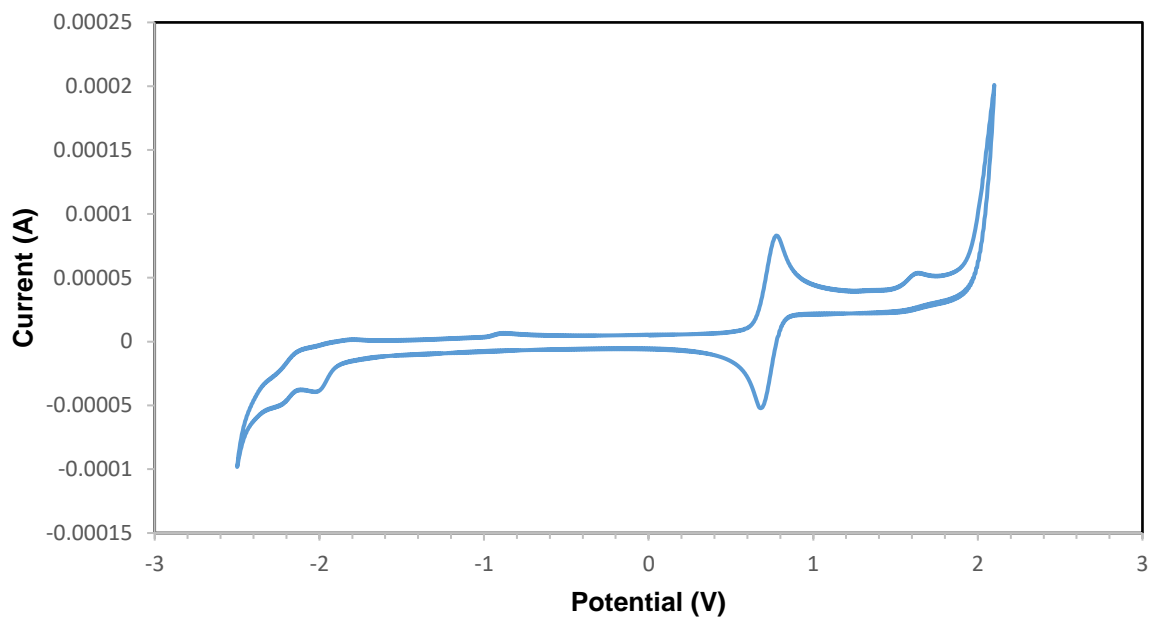

**Figure S26** Cyclic voltammogram of **2b**.

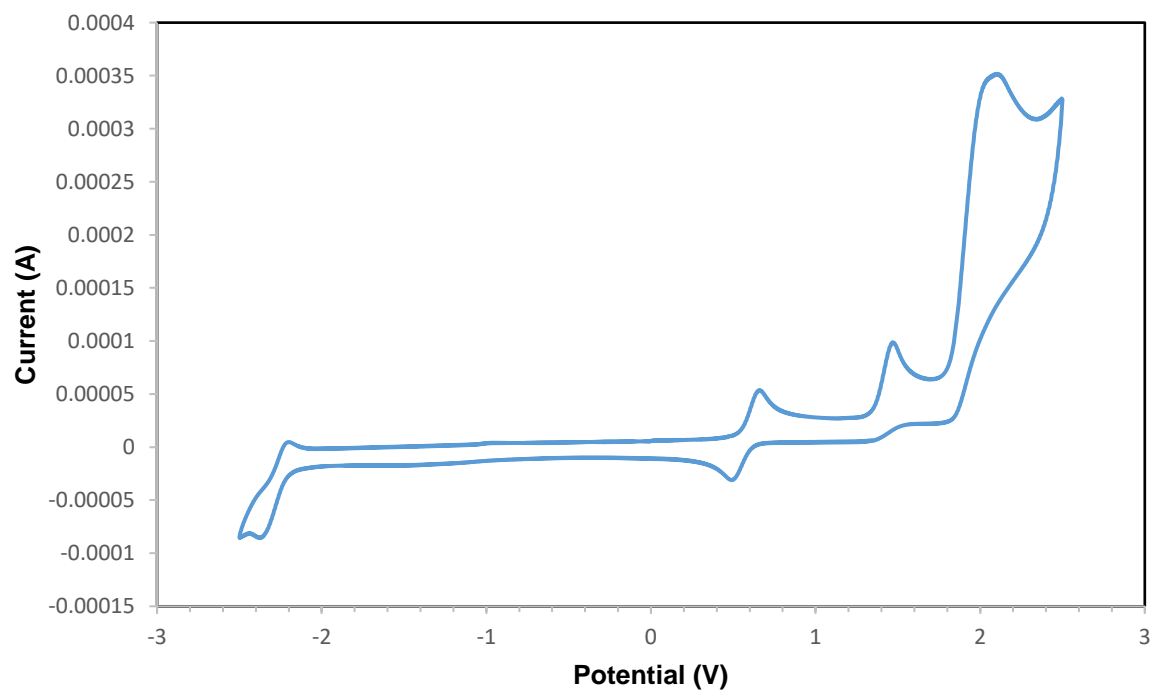

**Figure S27** Cyclic voltammogram of **3b**.



**Table S2.** Electrochemical data of **1b**, **2b** and **3b**.

| <b>Compound</b> | <b><math>E_{ox}</math> (V)</b> | <b>HOMO (eV)<sup>a</sup></b> | <b><math>E_{red}</math> (V)</b> | <b>LUMO (eV)<sup>a</sup></b> | <b>HOMO-LUMO gap (eV)</b> |
|-----------------|--------------------------------|------------------------------|---------------------------------|------------------------------|---------------------------|
| <b>1b</b>       | 1.44                           | - 5.65                       | -2.18                           | - 2.03                       | 3.62                      |
| <b>2b</b>       | 1.60                           | - 5.69                       | -2.07                           | - 2.02                       | 3.67                      |
| <b>3b</b>       | 1.48                           | - 5.71                       | -2.37                           | - 1.86                       | 3.85                      |

<sup>a</sup> The energy levels were calculated from the oxidation and reduction peaks as referenced to Fc/Fc<sup>+</sup> (4.8 eV) below vacuum level.
